# Supplementary material for: Synthesis and testing of chromogenic phenoxazinone substrates for β-alanyl aminopeptidase
Source: Royal Society of Chemistry journal article supplement (doi:10.1039/b716978g), 2008-01-01
Supplement: b716978g.pdf [file b716978g.pdf]

# Synthesis and Testing of Chromogenic Phenoxazinone Substrates for $\beta$ -Alanyl Aminopeptidase

Andrey V. Zaytsev,<sup>a</sup> Rosaleen J. Anderson,<sup>\*a</sup> Alexandre Bedernjak,<sup>a</sup> Paul W. Groundwater,<sup>\*a</sup> Yongxue Huang,<sup>a</sup> John D. Perry,<sup>b</sup> Sylvain Orenga,<sup>c</sup> Celine Roger-Dalbert,<sup>c</sup> and Arthur James<sup>d</sup>

5

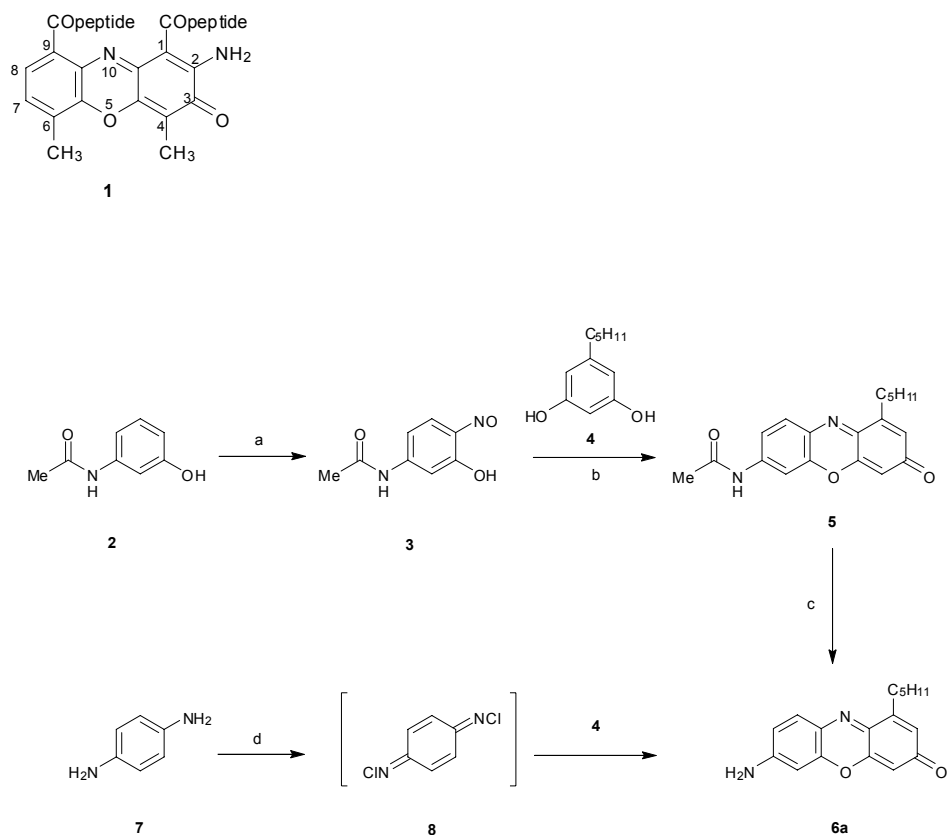

10

**Scheme 1** Reagents and conditions: [a] 'HNO<sub>2</sub>'; [b] "BuOH, concn. H<sub>2</sub>SO<sub>4</sub>; [c] 85% H<sub>2</sub>SO<sub>4</sub>, ethanol; [d] MeOH, CO(NH<sub>2</sub>)<sub>2</sub>, Cl<sub>2</sub>, then 4, reflux.

15

<sup>a</sup> Pharmacy, Chemistry and Biomedical Sciences, University of Sunderland, Sunderland SR1 3SD, U.K. Fax: +44(0)191 515 3405; Tel: +44(0)191 515 2600; E-mail: paul.groundwater@sunderland.ac.uk

<sup>b</sup> R&D Microbiology, bioMérieux, 3 Route del Port Michaud, 28 390 La Balme-les-Grottes, France. Fax: +33 (0)474 952 632; Tel: +33 (0)474 952 543; E-mail: sylvain.orenga@eu.biomerieux.com

<sup>c</sup> Department of Microbiology, Freeman Hospital, Newcastle upon Tyne NE7 7DN, Fax: +44(0)191 223 1224; Tel: +44(0)191 284 3111 x 26691; E-mail: john.perry@nuth.northy.nhs.uk

<sup>d</sup> School of Applied Sciences, Ellison Place, Northumbria University, Newcastle upon Tyne NE1 8ST, U.K.

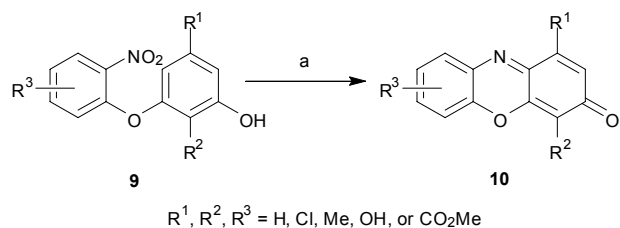

20

**Scheme 2** Reagents and conditions: [a] Zn, NH<sub>4</sub>Cl, H<sub>2</sub>O, DME, 40 °C

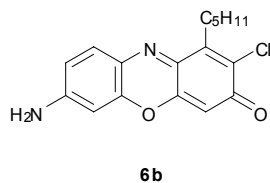

25

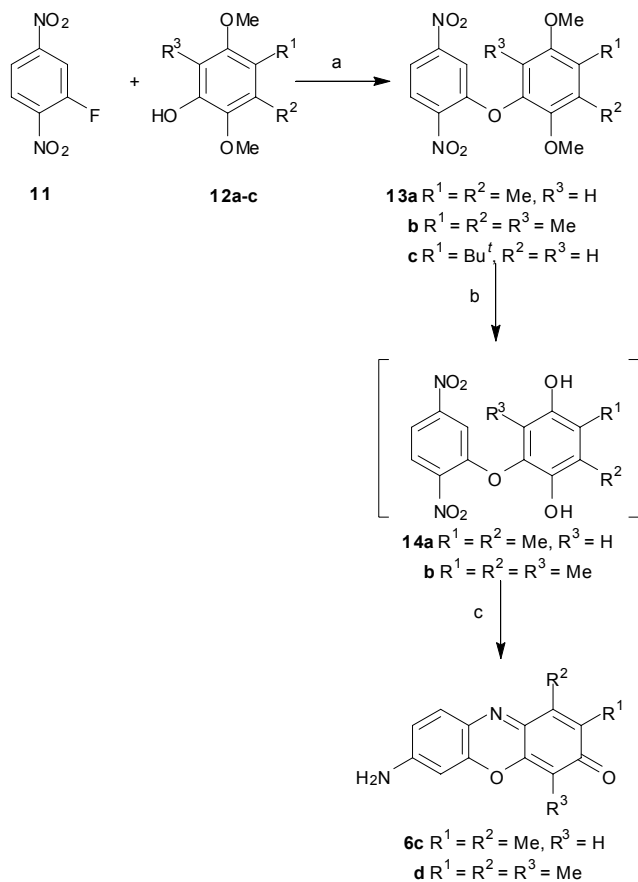

**Scheme 3** Reagents and conditions: [a] NaH, DMF, 40 °C; [b] BBr<sub>3</sub>, DCM, -78 °C; [c] 5 % Pd-on-C, MeOH then air / silica.

30

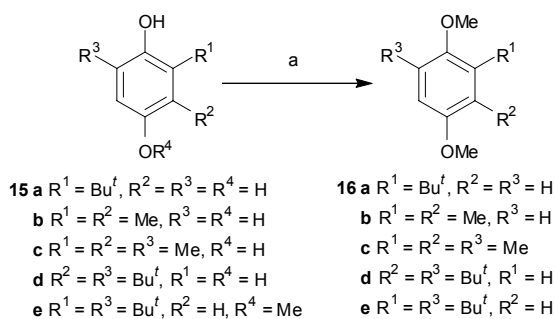

**Scheme 4** Reagents and conditions: [a] NaH, MeI, DMF, 40°C, 1 h; [b] hexamine, TFA, reflux; [c] i, MMPP, MeOH; ii, NaOH then HCl.

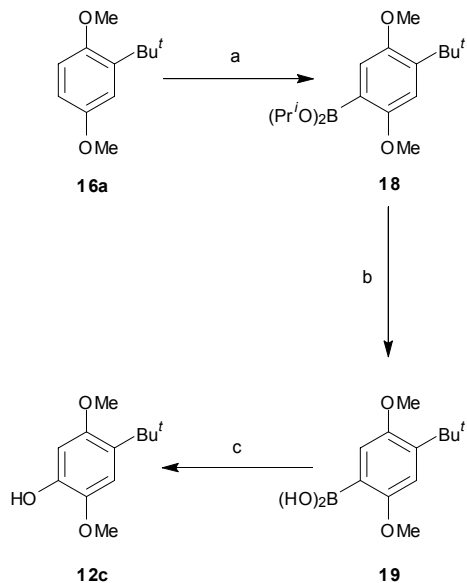

**Scheme 5** Reagents and conditions: [a]  $tBuLi$ , THF, -78°C then  $B(OPr^i)_3$ ; [b] 10 %  $NH_4Cl$ ; [c] 27 %  $H_2O_2$ , THF.

35

40

45

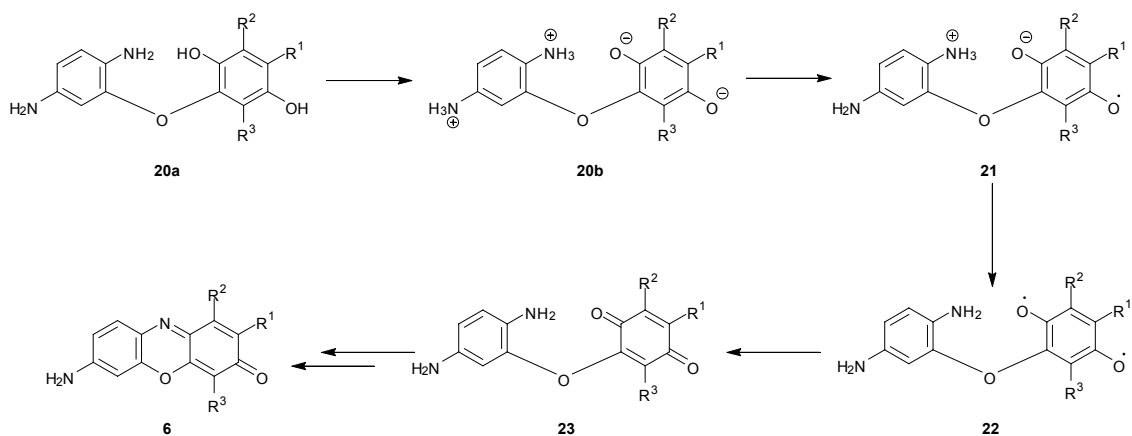

Scheme 6

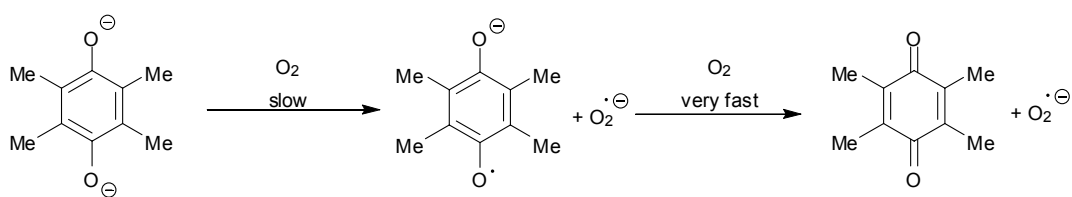

24

50 Scheme 7

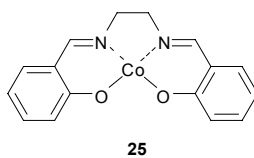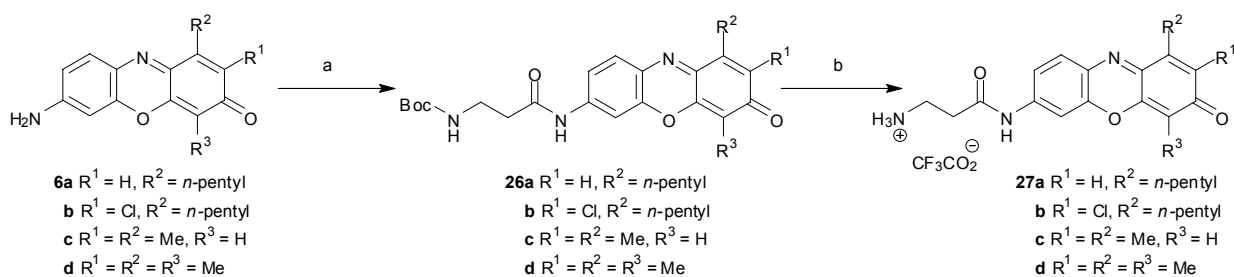

55

Scheme 8 Reagents and conditions: [a] 5% Pd-on-C, DMF, *N*-Boc- $\beta$ -alanine, HOBt, DIC, DCM; [b] TFA.

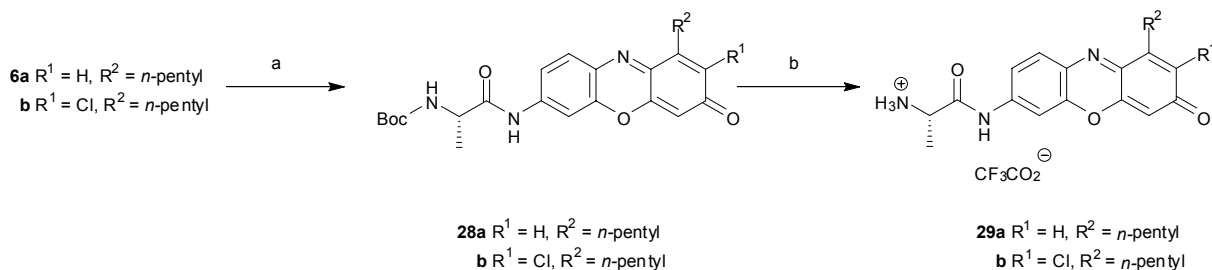

60

**Scheme 9** Reagents and conditions: [a] 5% Pd-on-C, DMF, *N*-<sup>t</sup>Boc-L-alanine, HOBt, DIC, DCM; [b] TFA.

## Experimental

### General

65 Melting points were determined on a Gallenkamp apparatus and are uncorrected. Elemental analyses were performed on an Exeter Analytical CE-440 Elemental Analyzer. IR spectra were recorded on a Perkin-Elmer 1600 series FTIR spectrophotometer. <sup>1</sup>H NMR spectra were acquired on a Bruker AVANCE 300 at 300 MHz or 70 AVANCE 500 at 500 MHz. Coupling constants are given in Hz and all chemical shifts are relative to the chemical shift of the residual non-deuterated solvent. <sup>13</sup>C NMR spectra were obtained on the Bruker AVANCE 300 at 75 MHz. Low resolution electrospray mass spectra were obtained on a Bruker Esquire 3000+ and high resolution 75 spectra on a Bruker APEX II FT mass spectrometer. Thin layer chromatography was performed on Merck silica gel 60F<sub>254</sub>. All solvents were purified according to standard procedures. Diethyl ether and tetrahydrofuran were freshly distilled over sodium wire with a trace of benzophenone. Fisons silica gel 60 (35-70 micron) 80 was used for wet flash chromatography. The samples were applied in liquid form or were pre-adsorbed onto silica 60 (35-70 micron).

### General procedure for the preparation of dimethoxybenzenes 16a-e<sup>17</sup>

In a dry 2-necked round bottom flask equipped with a condenser, a 85 magnetic stirring bar and a calcium chloride guard tube, the hydroquinone 12 (1 equiv.) was dissolved in dry DMF (50 ml) and NaH (2.2 equiv., 60% dispersion in oil) was added in small portions. After the base had been added and the evolution of H<sub>2</sub> had ceased, methyl iodide (4 equiv.) was added dropwise over 15-20 min.. When 90 the addition was finished, the reaction mixture was stirred at 40 °C for 2 hours. Brine (200 ml) was added to the flask and the resulting mixture was extracted with diethyl ether (3 × 50 ml). The combined organic layers were washed with water (2 × 50 ml) and dried over MgSO<sub>4</sub>. The solvent was evaporated under reduced pressure and the 95 residue was subjected to column chromatography.

#### 2-*tert*-Butyl-1,4-dimethoxybenzene 16a

Prepared from 2-*tert*-butylhydroquinone 12a (2.90 g, 17.5 mmol) and purified by column chromatography using petroleum ether (60-80 °C) : diethyl ether (95:5) as eluent; yellow oil (3.35 g, 99%) (lit.<sup>17</sup> bp 240 100 °C / 50 mm Hg) (Found: M<sup>+</sup>, 194.1301. Calc. for C<sub>12</sub>H<sub>18</sub>O<sub>2</sub>: M, 194.1316); δ<sub>H</sub> (300 MHz; CDCl<sub>3</sub>) 1.40 (9H, s, C(CH<sub>3</sub>)<sub>3</sub>), 3.80 (3H, s, OCH<sub>3</sub>), 3.83 (3H, s, OCH<sub>3</sub>), 6.72 (1H, dd, *J* = 8.8 Hz and *J* = 3.1 Hz, H-5), 6.84 (1H, d, *J* = 8.8 Hz, H-6), 6.93 (1H, d, *J* = 3.1 Hz, H-3); δ<sub>C</sub> (75 MHz; CDCl<sub>3</sub>) 30.1 (CH<sub>3</sub>, C(CH<sub>3</sub>)<sub>3</sub>), 35.3 (quat., C(CH<sub>3</sub>)<sub>3</sub>), 56.0

(CH<sub>3</sub>, OCH<sub>3</sub>), 56.0 (CH<sub>3</sub>, OCH<sub>3</sub>), 110.3 (CH, C-5), 112.8 (CH, C-6), 114.7 (CH, C-3), 140.3 (quat., C-2), 153.4 (quat., C-1 or C-4), 153.7 (quat., C-4 or C-1).

#### 1,4-Dimethoxy-2,3-dimethylbenzene 16b

Prepared from 2,3-dimethylhydroquinone 12b (1.96 g, 14.2 mmol) and purified by column chromatography using petroleum ether (60-80 110 °C) : diethyl ether (95:5) as eluent; white solid (2.27 g, 80%); mp 75-76 °C (lit.<sup>21</sup> mp 73-74 °C); δ<sub>H</sub> (300 MHz; CDCl<sub>3</sub>) 2.09 (6H, s, 2 × CH<sub>3</sub>), 3.70 (6H, s, 2 × OCH<sub>3</sub>), 6.58 (2H, s, 2 × ArH); δ<sub>C</sub> (75 MHz; CDCl<sub>3</sub>) 12.4 (CH<sub>3</sub>, 2 × ArCH<sub>3</sub>), 56.5 (CH<sub>3</sub>, 2 × OCH<sub>3</sub>), 108.4 (2 × 115 CH), 127.1 (2 × quat.), 152.4 (2 × quat.).

#### 1,4-Dimethoxy-2,3,5-trimethylbenzene 16c

Prepared from 2,3,5-trimethylhydroquinone 12c (2.175 g, 14.3 mmol) and purified by column chromatography using petroleum ether (60-80 °C) : diethyl ether (95:5) as eluent; colourless oil (2.367 g, 92%) 120 (lit.<sup>22</sup> mp 37-38 °C) (Found: MH<sup>+</sup>, 181.1225. Calc. for C<sub>11</sub>H<sub>17</sub>O<sub>2</sub>: MH, 181.1223); δ<sub>H</sub> (300 MHz; CDCl<sub>3</sub>) 2.17 (3H, s, CH<sub>3</sub>), 2.23 (3H, s, CH<sub>3</sub>), 2.33 (3H, s, CH<sub>3</sub>), 3.70 (3H, s, OCH<sub>3</sub>), 3.82 (3H, s, OCH<sub>3</sub>), 6.58 (1H, s, H-6); δ<sub>C</sub> (75 MHz; CDCl<sub>3</sub>) 12.2 (CH<sub>3</sub>), 13.0 (CH<sub>3</sub>), 16.7 (CH<sub>3</sub>), 56.2 (OCH<sub>3</sub>), 60.5 (OCH<sub>3</sub>), 110.8 (CH, C-6), 124.2 (quat., C- 125 5), 128.1 (quat., C-2 or C-3), 131.0 (quat., C-3 or C-2), 151.0 (quat., C-4), 153.9 (quat., C-1).

#### 2,5-Di-*tert*-butyl-1,4-dimethoxybenzene 16d

Prepared from 2,5-di-*tert*-butylhydroquinone 12d (2.79 g, 12.55 mmol) and purified by column chromatography using petroleum ether 130 (60-80 °C) : diethyl ether (95:5) as eluent; white solid (2.67 g, 85%), mp 99-100 °C (lit.<sup>23</sup> mp 101-102 °C); δ<sub>H</sub> (300 MHz; CDCl<sub>3</sub>) 1.40 (18H, s, C(CH<sub>3</sub>)<sub>3</sub>), 3.84 (6H, s, 2 × OCH<sub>3</sub>), 6.86 (2H, s, 2 × ArH); δ<sub>C</sub> (75 MHz; CDCl<sub>3</sub>) 30.2 (CH, C(CH<sub>3</sub>)<sub>3</sub>), 35.0 (quat., C(CH<sub>3</sub>)<sub>3</sub>), 56.3 (2 × OCH<sub>3</sub>), 112.1 (2 × CH), 136.8 (2 × quat.), 152.4 (2 × quat.).

#### 2,6-Di-*tert*-butyl-1,4-dimethoxybenzene 16e

Prepared from 3,5-di-*tert*-4-hydroxyanisole 12e (2.06 g, 8.72 mmol) and purified using petroleum ether (60-80 °C) : diethyl ether (98:2) as eluent; colourless oil (1.79 g, 82%); (Found: C, 77.05; H, 10.5. C<sub>16</sub>H<sub>26</sub>O<sub>2</sub> requires C, 76.75; H, 10.5 %); δ<sub>H</sub> (300 MHz; CDCl<sub>3</sub>) 1.35 140 (18H, s, C(CH<sub>3</sub>)<sub>3</sub>), 3.59 (3H, s, OCH<sub>3</sub>), 3.70 (3H, s, OCH<sub>3</sub>), 6.75 (2H, s, 2 × ArH); δ<sub>C</sub> (75 MHz; CDCl<sub>3</sub>) 32.4 (CH, C(CH<sub>3</sub>)<sub>3</sub>), 36.4 (quat., C(CH<sub>3</sub>)<sub>3</sub>), 55.7 (OCH<sub>3</sub>), 64.6 (OCH<sub>3</sub>), 112.2 (2 × CH), 144.9 (2 × quat.), 153.8 (2 × quat.), 154.7 (2 × quat.).

### Formylation of dimethoxybenzenes *via* the Duff reaction

145 The dimethoxybenzene (1 equiv.) was dissolved in TFA (20 ml) and hexamine (1.05 equiv.) was added to the resulting solution. The reaction mixture was refluxed under dry conditions for 2 hours. The TFA was evaporated under reduced pressure, the residue was dissolved in ether (100 ml) and the organic solution was washed with  
150 water (3 × 50 ml) and then dried over MgSO<sub>4</sub>. The solvent was evaporated and the residue subjected to column chromatography, eluting with petroleum ether (60-80 °C) : diethyl ether (80:20).

### 2,5-Dimethoxy-3,4-dimethylbenzaldehyde 17a

Prepared from 1,4-dimethoxy-2,3-dimethylbenzene **16b** (2.270 g, 13.7 mmol). 2,5-Dimethoxy-3,4-dimethylbenzaldehyde **17a** was isolated as a white solid (1.18 g, 44%); mp 61-62 °C (lit.<sup>24</sup> mp 67.5-68.5 °C) (Found: MH<sup>+</sup>, 195.1019. Calc. for C<sub>11</sub>H<sub>15</sub>O<sub>3</sub>: MH, 195.1016); ν<sub>max</sub> (KBr)/cm<sup>-1</sup> 1685 (C=O), 1595 (C=C); δ<sub>H</sub> (300 MHz; CDCl<sub>3</sub>) 2.26 (3H, s, CH<sub>3</sub>), 2.29 (3H, s, CH<sub>3</sub>), 3.83 (3H, s, OCH<sub>3</sub>), 3.85 (3H, s, OCH<sub>3</sub>), 7.16 (1H, s, H-6), 10.38 (1H, s, CHO); δ<sub>C</sub> (75 MHz; CDCl<sub>3</sub>) 12.5 (CH<sub>3</sub>), 13.3 (CH<sub>3</sub>), 56.1 (OCH<sub>3</sub>), 64.2 (OCH<sub>3</sub>), 105.4 (CH, C-6), 127.0 (quat., C-1), 132.3 (quat., C-3), 135.8 (quat., C-4), 154.7 (quat., C-2), 156.9 (quat., C-5), 190.4 (CHO).

### 2,5-Dimethoxy-3,4,6-trimethylbenzaldehyde 17b

165 Prepared from 1,4-dimethoxy-2,3,5-trimethylbenzene **16c** (2.274 g, 12.6 mmol). 2,5-Dimethoxy-3,4,6-trimethylbenzaldehyde **17b** was isolated as a yellow solid (1.21 g, 46%); mp 65-66 °C (lit.<sup>25</sup> mp 80 °C) (Found: MH<sup>+</sup>, 209.1176. Calc. for C<sub>12</sub>H<sub>16</sub>O<sub>3</sub>: MH, 209.1172); ν<sub>max</sub> (KBr)/cm<sup>-1</sup> 1685 (C=O), 1586 (C=C), 1255 (C-O); δ<sub>H</sub> (500 MHz; CDCl<sub>3</sub>) 2.23 (3H, s, CH<sub>3</sub>), 2.31 (3H, s, CH<sub>3</sub>), 2.53 (3H, s, CH<sub>3</sub>), 3.70 (3H, s, OCH<sub>3</sub>), 3.82 (3H, s, OCH<sub>3</sub>), 10.47 (1H, s, CHO); δ<sub>C</sub> (125 MHz; CDCl<sub>3</sub>) 12.5 (CH<sub>3</sub>), 13.3 (CH<sub>3</sub>), 14.2 (CH<sub>3</sub>), 60.7 (OCH<sub>3</sub>), 63.8 (OCH<sub>3</sub>), 126.0 (quat., C-1), 129.7 (quat., C-3), 132.1 (quat., C-6), 140.2 (quat., C-4), 153.6 (quat., C-2), 160.0 (quat., C-5), 194.9  
175 (CHO).

### 2,5-Dimethoxy-3,4-dimethylphenol 12a

Prepared from 3,4-dimethyl-2,5-dimethoxybenzaldehyde **17a** (1.126 g, 5.8 mmol). Using light petroleum (60-80 °C) : diethyl ether (60:40) as eluent, 2,5-dimethoxy-3,4-dimethylphenol **12a** was isolated as a  
180 yellow solid (0.239 g, 23%), mp 69-71 °C (lit.<sup>21</sup> mp 70-71 °C); (Found: C, 65.9; H, 7.7. C<sub>10</sub>H<sub>14</sub>O<sub>3</sub> requires C, 65.9; H, 7.7 %); ν<sub>max</sub> (film)/cm<sup>-1</sup> 3263 (OH), 1598 (C=C), 1261 (C-O); δ<sub>H</sub> (300 MHz; CDCl<sub>3</sub>) 2.09 (3H, s, CH<sub>3</sub>), 2.22 (3H, s, CH<sub>3</sub>), 3.74 (3H, s, OCH<sub>3</sub>), 3.78 (3H, s, OCH<sub>3</sub>), 4.74 (1H, br s, OH), 6.44 (1H, s, H-6); δ<sub>C</sub> (75 MHz; CDCl<sub>3</sub>) 11.7 (CH<sub>3</sub>), 13.0 (CH<sub>3</sub>), 56.1 (CH, OCH<sub>3</sub>), 61.4 (CH, OCH<sub>3</sub>), 97.0 (CH, C-6), 117.4 (quat., C-4), 130.6 (quat., C-3), 139.5 (quat., C-2), 147.1 (quat., C-1), 154.7 (quat., C-5); *m/z* 183 (MH<sup>+</sup>).

### 2,5-Dimethoxy-3,4,6-trimethylphenol 12b

Prepared from 3,4,6-trimethyl-2,5-dimethoxybenzaldehyde **17b**  
190 (1.205 g, 5.8 mmol). Using light petroleum (60-80 °C) : diethyl ether (75:25) as eluent, 2,5-dimethoxy-3,4,6-trimethylphenol **12a** was isolated as a white solid (0.856 g, 75%) mp 105-106 °C, (Found: C, 67.4; H, 8.2. C<sub>11</sub>H<sub>16</sub>O<sub>3</sub> requires C, 67.3; H, 8.2 %); ν<sub>max</sub> (KBr)/cm<sup>-1</sup> 3401 (OH), 1265 (C-O); δ<sub>H</sub> (300 MHz; CDCl<sub>3</sub>) 2.18 (3H, s, CH<sub>3</sub>),  
195 2.23 (6H, s, 2 × CH<sub>3</sub>), 3.71 (3H, s, OCH<sub>3</sub>), 3.77 (3H, s, OCH<sub>3</sub>), 5.71 (1H, br s, OH); δ<sub>C</sub> (75 MHz; CDCl<sub>3</sub>) 9.1 (CH<sub>3</sub>), 12.0 (CH<sub>3</sub>), 12.5 (CH<sub>3</sub>), 60.2 (OCH<sub>3</sub>), 60.9 (OCH<sub>3</sub>), 115.0 (quat.), 121.0 (quat.), 126.8 (quat.), 141.7 (quat.), 145.3 (quat.), 153.4 (quat.).

### Preparation of 4-*tert*-Butyl-2,5-dimethoxyphenol 12c

200 In a flame-dried flask, 2-*tert*-butyl-1,4 dimethoxybenzene **16a** (2.27 g, 11.7 mmol) was dissolved in dry THF (30 ml), the resulting solution was cooled to -78 °C and a solution of BuLi (2.82M in hexanes, 5.0 ml, 14.0 mmol) was added dropwise. After the addition was complete, the reaction mixture was allowed to warm to room  
205 temperature, stirred for 15 min. at this temperature and cooled again to -78 °C. Triisopropyl borate (3.2 ml, 0.01402 mol) was introduced dropwise and the reaction mixture was left to stir at room temperature. After 12 hours the reaction mixture was quenched with 10% NH<sub>4</sub>Cl solution (50 ml) and water (50 ml) and extracted with  
210 diethyl ether (3 × 50ml). The combined organic layers were washed with brine (50 ml) and dried over MgSO<sub>4</sub>. The solvent was evaporated under reduced pressure, the residue was dissolved in THF (10 ml) and aqueous H<sub>2</sub>O<sub>2</sub> (27% w/v, 5 ml) was added. The emulsion was stirred at room temperature for 30 min.. Water (100 ml) was  
215 added and the mixture was extracted with diethyl ether (3 × 50 ml), and dried over MgSO<sub>4</sub>. The solvent was removed under vacuum and the residue was purified by column chromatography using light petroleum (60-80 °C) : ethyl acetate (80:20) as eluent to give the title compound **12c** as a white solid (1.010 g, 41%), mp 46-47 °C (lit.<sup>26</sup> mp  
220 54-55 °C); ν<sub>max</sub> (film)/cm<sup>-1</sup> 3542, 3433 (OH), 1600 (C=C); δ<sub>H</sub> (300 MHz; CDCl<sub>3</sub>) 1.22 (9H, s, C(CH<sub>3</sub>)<sub>3</sub>), 3.61 (3H, s, OCH<sub>3</sub>), 3.71 (3H, s, OCH<sub>3</sub>), 6.43 (1H, s, H-6), 6.70 (1H, s, H-3); δ<sub>C</sub> (75 MHz; CDCl<sub>3</sub>) 30.6 (CH<sub>3</sub>, C(CH<sub>3</sub>)<sub>3</sub>), 34.9 (quat., C(CH<sub>3</sub>)<sub>3</sub>), 56.1 (OCH<sub>3</sub>), 57.3 (OCH<sub>3</sub>), 100.9 (CH, C-6), 111.2 (CH, C-3), 130.1 (quat., C-4), 139.9  
225 (quat.), 144.6 (quat.), 153.6 (quat.).

### General preparation of biaryl ethers 13a-c

The appropriate phenol (1 equiv.) was dissolved in dry DMF (10 ml) and NaH (60% dispersion in oil; 1.1 equiv.) was added in small portions. After the evolution of gas was complete, the resulting  
230 solution of the sodium phenolate was stirred at room temperature for 15 min.. A solution of 2,5-dinitrofluorobenzene **18** (1 equiv.) in dry THF (5 ml) was then added dropwise to the flask and the reaction mixture was stirred for 2 hours. Finally, the contents of the flask were poured into water (50 ml), extracted with ether (3 × 20 ml) and the  
235 combined organic layers were dried over MgSO<sub>4</sub>. The solvent was removed under reduced pressure and the residue was subjected to column chromatography on silica.

### 1-(2',5'-Dinitrophenoxy)-3,4-dimethyl-2,5-dimethoxybenzene 13a

240 Prepared from 2,5-dinitrofluorobenzene **11** (0.293 g, 1.6 mmol) and 2,5-dimethoxy-3,4-dimethylphenol **12a** (0.287 g, 1.6 mmol). Purified using light petroleum (60-80 °C) : ethyl acetate (85:15) as eluent to give 1-(2',5'-dinitrophenoxy)-3,4-dimethyl-2,5-dimethoxybenzene  
245 **13a** as an orange solid (0.415 g, 76 %); mp 135-136 °C; (Found: MH<sup>+</sup>, 349.1030. Calc. for C<sub>16</sub>H<sub>17</sub>O<sub>7</sub>N<sub>2</sub>: M, 349.1017); ν<sub>max</sub> (KBr)/cm<sup>-1</sup> 1551, 1346 (NO<sub>2</sub>), 1246 (C-O); δ<sub>H</sub> (300 MHz; CDCl<sub>3</sub>) 2.10 (3H, s, CH<sub>3</sub>), 2.17 (3H, s, CH<sub>3</sub>), 3.58 (3H, s, OCH<sub>3</sub>), 3.71 (3H, s, OCH<sub>3</sub>), 6.49 (1H, s, H-6), 7.52 (1H, d, *J* = 2.2 Hz, H-6'), 7.84 (1H, dd, *J* = 8.8 Hz and 2.2 Hz, H-4'), 7.93 (1H, d, *J* = 8.8 Hz, H-3'); δ<sub>C</sub> (75 MHz; CDCl<sub>3</sub>) 12.4 (CH<sub>3</sub>), 13.0 (CH<sub>3</sub>), 56.3 (OCH<sub>3</sub>), 61.7 (OCH<sub>3</sub>), 102.6  
250 (CH, C-6), 112.8 (CH, C-6'), 116.7 (CH, C-4'), 125.5 (quat.), 126.4 (CH, C-3'), 133.7 (quat.), 143.1 (quat.), 143.6 (quat.), 150.8 (quat.), 152.6 (quat.), 154.8 (quat.).

### 1-(2',5'-Dinitrophenoxy)-3,4,6-trimethyl-2,5-dimethoxybenzene 13b

Prepared from 2,5-dinitrofluorobenzene **11** (0.812 g, 4.362 mmol) and 2,5-dimethoxy-3,4,6-trimethylphenol **12b** (0.856 g, 4.362 mmol). Purified using light petroleum (60-80 °C) : diethyl ether (75:25) as eluent and recrystallised from ethanol to give 1-(2',5'-dinitrophenoxy)-3,4,6-trimethyl-2,5-dimethoxybenzene **13b** as a yellow solid (1.412 g, 89 %); mp 136-137 °C (Found: C, 56.35; H, 5.0; N, 7.6. C<sub>17</sub>H<sub>18</sub>N<sub>2</sub>O<sub>7</sub> requires C, 56.35; H, 5.0; N, 7.7 %);  $\nu_{\max}$  (KBr)/cm<sup>-1</sup> 1544, 1348 (NO<sub>2</sub>), 1249 (C-O);  $\delta_{\text{H}}$  (300 MHz; CDCl<sub>3</sub>) 2.15 (3H, s, CH<sub>3</sub>), 2.21 (3H, s, CH<sub>3</sub>), 2.26 (3H, s, CH<sub>3</sub>), 3.66 (3H, s, OCH<sub>3</sub>), 3.71 (3H, s, OCH<sub>3</sub>), 7.46 (1H, d, *J* = 2.2 Hz, H-6'), 7.93 (1H, dd, *J* = 8.9 and 2.2 Hz, H-4'), 8.03 (1H, d, *J* = 8.9 Hz, H-3');  $\delta_{\text{C}}$  (75 MHz; CDCl<sub>3</sub>) 12.4 (CH<sub>3</sub>), 12.8 (CH<sub>3</sub>), 13.2 (CH<sub>3</sub>), 60.8 (OCH<sub>3</sub>), 61.5 (OCH<sub>3</sub>), 111.8 (CH, C-6'), 116.6 (CH, C-4'), 122.6 (quat.), 126.5 (CH, C-3'), 130.0 (quat.), 130.5 (quat.), 142.5 (quat.), 142.8 (quat.), 146.6 (quat., C-2), 150.9 (quat.), 152.1 (quat.), 153.9 (quat., C-5).

### 1-(2',5'-Dinitrophenoxy)-4-*tert*-butyl-2,5-dimethoxybenzene **13c**

Prepared from 2-fluoro-1,4-dinitrobenzene **11** (0.829 g, 4.457 mmol) and 4-*tert*-butyl-2,5-dimethoxyphenol **12c** (0.937 g, 4.457 mmol). Purified using light petroleum (60-80 °C):diethyl ether (80:20) to give ether **13c** as a yellow solid (1.435 g, 86 %), mp 132-133 °C; (Found: C, 57.4; H, 5.35; N, 7.25. C<sub>17</sub>H<sub>18</sub>N<sub>2</sub>O<sub>7</sub> requires C, 57.4; H, 5.4; N, 7.4 %);  $\nu_{\max}$ (KBr)/cm<sup>-1</sup> 1545, 1349 (NO<sub>2</sub>), 1245 (C-O);  $\delta_{\text{H}}$  (300 MHz; CDCl<sub>3</sub>) 1.33 (9H, s, C(CH<sub>3</sub>)<sub>3</sub>), 3.58 (3H, s, OCH<sub>3</sub>), 3.79 (3H, s, OCH<sub>3</sub>), 6.66 (1H, s, H-3), 6.94 (1H, s, H-6), 7.56 (1H, d, *J* = 2.2 Hz, H-6'), 7.84 (1H, dd, *J* = 8.9 and 2.2 Hz, H-4'), 7.93 (1H, d, *J* = 8.9 Hz, H-3');  $\delta_{\text{C}}$  (75 MHz; CDCl<sub>3</sub>) 30.0 (CH, C(CH<sub>3</sub>)<sub>3</sub>), 35.5 (quat., C(CH<sub>3</sub>)<sub>3</sub>), 56.2 (OCH<sub>3</sub>), 57.4 (OCH<sub>3</sub>), 106.9 (CH, C-3), 113.1 (CH, C-6'), 114.2 (CH, C-6), 116.7 (CH, C-4'), 126.5 (CH, C-3'), 138.3 (quat., C-4), 140.0 (quat., C-1), 143.2 (quat., C-5'), 144.2 (quat.), 150.7 (quat.), 152.6 (quat.), 153.7 (quat.).

### General procedure for preparation of 7-aminophenoxazin-3-ones **6c,d**

The dihydroxydiaryl ether (1.3 mmol) was dissolved in methanol (5 ml) and 5% Pd/C (10 % w/w) was added to the solution. The reaction mixture was stirred at room temperature in the hydrogenator under a hydrogen atmosphere for 4 hours. Sufficient silica to adsorb the residue for the subsequent column chromatography was added to the flask, and the mixture was stirred vigorously for a further 4 hours in air. When the oxidation was complete, the solvent was removed and the residue was subjected to column chromatography on silica eluting with light petroleum (60-80 °C) : ethyl acetate (50:50 to 0:100) then with ethyl acetate : methanol (90:10).

### 7-Amino-1,2-dimethylphenoxazin-3-one **6c**

Prepared from 1-(2',5'-dinitrophenoxy)-3,4-dimethyl-2,5-dimethoxybenzene **13a** (0.266 g, 0.76 mmol) in a one-pot reaction. 7-Amino-1,2-dimethylphenoxazin-3-one **6c** was obtained as a brown-red solid (0.125 g, 68 %); mp > 270 °C;  $\nu_{\max}$  (KBr)/cm<sup>-1</sup> 3315, 3201 (NH<sub>2</sub>), 1600 (C=O), 1545 (C=C);  $\delta_{\text{H}}$  (300 MHz; DMSO-*d*<sub>6</sub>) 2.02 (3H, s, CH<sub>3</sub>), 2.33 (3H, s, CH<sub>3</sub>), 6.10 (1H, s, H-4), 6.47 (1H, d, *J* = 2.3 Hz, H-6), 6.67 (1H, dd, *J* = 8.8 and Hz, H-8), 6.73 (2H, s, NH<sub>2</sub>), 7.48 (1H, d, *J* = 8.8 Hz, H-9);  $\delta_{\text{C}}$  (75 MHz; DMSO-*d*<sub>6</sub>) 13.3 (CH<sub>3</sub>), 13.5 (CH<sub>3</sub>), 98.0 (CH, C-6), 104.4 (CH, C-4), 113.8 (CH, C-8), 125.9 (quat., C-7), 132.6 (CH, C-9), 136.7 (quat.), 138.1 (quat.), 141.0 (quat.), 147.0 (quat., C-9a), 150.3 (quat., C-4a), 155.3 (quat., C-5a), 184.4 (quat., C-3).

### 7-Amino-1,2,4-trimethylphenoxazin-3-one **6d**

1-(2',5'-Dinitrophenoxy)-3,4,6-trimethyl-2,5-dihydroxybenz-ene **14b** was prepared from 1-(2',5'-dinitrophenoxy)-3,4,6-trimethyl-2,5-dimethoxybenzene **13b** (0.626 g, 1.73 mmol), using light petroleum (60-80 °C) : diethyl ether (70:30) as eluent, and isolated as an orange solid (0.435 g, 75 %); mp 180-181 °C; (Found: MH<sup>+</sup>, 255.1129. Calc. for C<sub>15</sub>H<sub>15</sub>O<sub>2</sub>N<sub>2</sub>: MH, 255.1128);  $\nu_{\max}$  (KBr)/cm<sup>-1</sup> 3490 (NH<sub>2</sub> and OH), 1606 (C=O), 1591 (C=C);  $\delta_{\text{H}}$  (300 MHz; DMSO-*d*<sub>6</sub>) 1.98 (3H, s, CH<sub>3</sub>), 2.11 (3H, s, CH<sub>3</sub>), 2.14 (3H, s, CH<sub>3</sub>), 7.23 (1H, d, *J* = 2.3 Hz, H-6'), 7.94 (1H, br s, OH), 7.99 (1H, dd, *J* = 8.9 and 2.3 Hz, H-4'), 8.28 (1H, d, *J* = 8.9 Hz, H-3'), 8.38 (1H, br s, OH);  $\delta_{\text{C}}$  (75 MHz; DMSO-*d*<sub>6</sub>) 10.6 (CH<sub>3</sub>), 13.3 (CH<sub>3</sub>), 13.7 (CH<sub>3</sub>), 111.0 (CH), 116.4 (quat.), 117.4 (quat.), 124.1 (quat.), 124.2 (quat.), 127.7 (CH), 137.6 (quat.), 140.7 (quat.), 143.3 (quat.), 146.9 (quat.), 150.9 (quat.), 152.0 (quat.).

1-(2',5'-Dinitrophenoxy)-3,4,6-trimethyl-2,5-dihydroxybenz-ene **14b** (0.435 g, 1.30 mmol) was then treated as described above to give 7-amino-1,2,4-trimethylphenoxazin-3-one **6d** as a brown-red solid (0.237 g, 72 %); mp > 270 °C;  $\nu_{\max}$  (KBr)/cm<sup>-1</sup> 3320, 3211 (NH<sub>2</sub>), 1610 (C=C);  $\delta_{\text{H}}$  (300 MHz; DMSO-*d*<sub>6</sub>) 1.96 (3H, s, CH<sub>3</sub>), 2.04 (3H, s, CH<sub>3</sub>), 2.31 (3H, s, CH<sub>3</sub>), 6.49 (1H, d, *J* = 2.3 Hz, H-6), 6.60 (2H, br s, NH<sub>2</sub>), 6.63 (1H, dd, *J* = 8.7 and 2.3 Hz, H-8), 7.44 (1H, d, *J* = 8.7 Hz, H-9);  $\delta_{\text{C}}$  (75 MHz; DMSO-*d*<sub>6</sub>) 8.5 (CH<sub>3</sub>), 13.3 (CH<sub>3</sub>), 13.6 (CH<sub>3</sub>), 98.2 (CH, C-6), 111.9 (quat., C-4), 113.3 (CH, C-8), 125.4 (quat., C-7), 132.3 (CH, C-9), 136.0 (quat.), 137.1 (quat.), 141.3 (quat.), 146.4 (quat., C-9a), 147.2 (quat., C-4a), 154.8 (quat., C-5a), 184.1 (quat., C-3).

### 7-*N*-(*N*'-Boc- $\beta$ -alanyl)amino-1-pentylphenoxazin-3-one **26a** and 7-*N*-(*N*'-Boc- $\beta$ -alanyl)amino-2-chloro-1-pentylphenoxazin-3-one **26b**

Acetic acid (30 %, 200 ml) was added dropwise, with stirring, to a solution in which sodium borohydride (4 - 6 g) and sodium hydroxide (0.2 g) were dissolved in water (200 ml). The hydrogen gas produced was passed into a three-necked flask in which a mixture of 7-amino-1-pentylphenoxazin-3-one **6a** and 7-amino-2-chloro-1-pentylphenoxazin-3-one **6b**<sup>14</sup> (0.564 g) was dissolved in dry DMF (15 ml), and the solution was diluted with dry THF (15 ml). 5 % Pd/C (0.2 g) was added and hydrogen gas was bubbled slowly through the solution for 1 hour after the reduction appeared to be complete, as evidenced by the replacement of the purple colour of the solution by a weak grey-green colour. In a separate flask, *N*'-Boc- $\beta$ -alanine (0.756 g, 4.0 mmol) and *N*-methylmorpholine (0.408 g, 4.0 mmol) were dissolved in dry THF (10 ml), the solution was cooled to -20 °C and isobutyl chloroformate (0.56 ml, 4.0 mmol) was added with stirring. The mixture was stirred at -20 °C for a further 30 min., after which time the mixture was introduced into the reduced resorufamine solution at -10 °C with the continued passage of hydrogen gas. After 15 min., hydrogen was no longer admitted, the system was sealed and the reaction mixture was stirred overnight at room temperature. The reaction mixture was filtered and solvent was evaporated under reduced pressure, the residual solid was dissolved in DCM (50 ml), filtered, and the DCM solution washed with NaHCO<sub>3</sub> (5 %, 2 × 50 ml) and water (50 ml). The organic phase was dried (MgSO<sub>4</sub>), filtered and concentrated to afford a residue consisting of two products, which was purified by column chromatography on silica, eluting with petrol / ethyl acetate (6:4), to give 7-*N*-(*N*'-Boc- $\beta$ -alanyl)amino-2-chloro-1-pentylphenoxazin-3-one **26b** (as the first spot) as an orange solid (0.12 g) mp 226-227 °C; (Found: MH<sup>+</sup>,

370 488.1942. Calc. for C<sub>25</sub>H<sub>31</sub>O<sub>5</sub>N<sub>3</sub>Cl: MH, 488.1945);  $\nu_{\max}$  (KBr) / cm<sup>-1</sup> 3388 (NH), 3269 (NH), 1699 (C=O), 1603 (C=O), 1577 (C=C);  $\delta_{\text{H}}$  (300 MHz, DMSO-*d*<sub>6</sub>) 0.89 (3H, t, *J* = 6.8 Hz, 5'-CH<sub>3</sub>), 1.38 (13H, m, 3'-CH<sub>2</sub>, 4'-CH<sub>2</sub>, C(CH<sub>3</sub>)<sub>3</sub>), 1.59 (2H, m, 2'-CH<sub>2</sub>), 2.56 (2H, t, *J* = 6.8 Hz, NHCH<sub>2</sub>CH<sub>2</sub>CO), 3.00 (2H, m, 1'-CH<sub>2</sub>), 3.25 (2H, q, *J* = 6.8 Hz, NHCH<sub>2</sub>CH<sub>2</sub>CO), 6.40 (1H, s, H-4), 6.93 (1H, d, *J* = 4.95 Hz, NH), 7.52 (1H, d, *J* = 8.4 Hz, H-8), 7.79 (1H, d, *J* = 8.2 Hz, H-9), 7.93 (1H, s, H-6), 10.60 (1H, br, ArNH);  $\delta_{\text{C}}$  (75.5 MHz, DMSO-*d*<sub>6</sub>) 14.6 (CH<sub>3</sub>, C-5'), 22.6 (CH<sub>2</sub>, C-4'), 28.4 (CH<sub>2</sub>, C-2'), 28.5 (CH<sub>2</sub>, C-1'), 29.1 (3 × CH<sub>3</sub>), 32.0 (CH<sub>2</sub>, C-3'), 37.1 (CH<sub>2</sub>), 37.9 (CH<sub>2</sub>), 78.55 (quat.), 105.3 (CH, C-4), 108.2 (CH, C-6), 117.5 (CH, C-8), 129.6 (quat., C-7), 131.9 (CH, C-9), 136.7 (quat., C-5a), 145.1 (quat., C-10a), 149.6 (quat., C-4a), 156.4 (C=O), 171.4 (C=O), 187.8 (C=O, C-3).

7-*N*-(*N*'-Boc-β-alanyl)amino-1-pentylphenoxazin-3-one **26a** (second spot) was obtained as an orange solid (0.11 g) mp 212.5-214.0 °C; (Found: MH<sup>+</sup>, 454.2330. Calc. for C<sub>25</sub>H<sub>32</sub>O<sub>5</sub>N<sub>3</sub>: MH, 454.2334);  $\nu_{\max}$  (KBr) / cm<sup>-1</sup> 3379 (NH), 3265 (NH), 1703 (C=O), 1647 (C=O), 1612 (C=O), 1591 (C=C);  $\delta_{\text{H}}$  (300 MHz, CD<sub>3</sub>OD) 0.96 (3H, t, *J* = 7.0 Hz, 5'-CH<sub>3</sub>), 1.29 - 1.44 (15H, m, 2'-CH<sub>2</sub>, 3'-CH<sub>2</sub>, 4'-CH<sub>2</sub>, C(CH<sub>3</sub>)<sub>3</sub>), 2.63 (2H, t, *J* = 6.6 Hz, NHCH<sub>2</sub>CH<sub>2</sub>CO), 2.91 (2H, t, *J* = 8.0 Hz, 1'-CH<sub>2</sub>), 3.43 (2H, t, *J* = 6.7 Hz, NHCH<sub>2</sub>CH<sub>2</sub>CO), 6.26 (1H, d, *J* = 2.1 Hz, H-4), 6.68 (1H, d, *J* = 2.1 Hz, H-2), 7.50 (1H, dd, *J* = 8.7 and 2.3 Hz, H-8), 7.81 (1H, d, *J* = 8.8 Hz, H-9), 8.01 (1H, d, *J* = 2.1 Hz, H-6);  $\delta_{\text{C}}$  (75.5 MHz, CD<sub>3</sub>OD) 14.4 (CH<sub>3</sub>, C-5'), 22.85 (CH<sub>2</sub>, C-4'), 28.8 (C(CH<sub>3</sub>)<sub>3</sub>), 29.1 (CH<sub>2</sub>, C-2'), 30.0 (CH<sub>2</sub>, C-1'), 32.0 (CH<sub>2</sub>, C-3'), 37.1 (CH<sub>2</sub>), 37.9 (CH<sub>2</sub>), 78.55 (quat.), 106.25 (CH, C-4), 106.4 (CH, C-6), 116.7 (CH, C-8), 129.75 (quat., C-7), 131.3 (CH, C-9), 131.75 (CH, C-2), 142.4 (quat., C-1), 144.9 (quat., C-9a), 146.8 (quat., C-5a), 147.65 (quat., C-10a), 150.4 (quat., C-4a), 157.3 (carbamate C=O), 172.25 (amide C=O), 184.7 (C=O, C-3).

**7-*N*-(*N*'-Boc-L-alanyl)amino-1-pentylphenoxazin-3-one **28a** and 7-*N*-(*N*'-Boc-L-alanyl)aminophenoxazin-2-chloro-1-pentyl-3-one **28b****

Prepared using the same method as for the β-Ala derivatives **26a** and **26b**, from a mixture of 7-amino-1-pentylphenoxazin-3-one **6a** and 7-amino-2-chloro-1-pentylphenoxazin-3-one **6b**<sup>14</sup> (0.564 g) and *N*'-Boc-L-alanine (0.756 g, 4.0 mmol), *N*-methylmorpholine (0.408 g, 4.0 mmol) and isobutyl chloroformate (0.56 ml, 4.0 mmol). Column chromatography on silica, eluting with petrol / ethyl acetate (7:3) gave 7-*N*-(*N*'-Boc-L-alanyl)amino-2-chloro-1-pentylphenoxazin-3-one **28b** (as the first spot) as an orange solid (0.12 g) (Found: MH<sup>+</sup>, 488.1944. Calc. for C<sub>25</sub>H<sub>31</sub>O<sub>5</sub>N<sub>3</sub>Cl: MH, 488.1945); mp 231.0-232.5 °C;  $[\alpha]_{\text{D}}^{20}$  -250° (c 0.10, CHCl<sub>3</sub>);  $\nu_{\max}$  (KBr)/cm<sup>-1</sup> 3442 (NH), 1701 (C=O), 1645 (C=O), 1604 (C=O), 1253 (C-O);  $\delta_{\text{H}}$  (300 MHz, CDCl<sub>3</sub>) 0.90 (3H, t, *J* = 6.6 Hz, 5'-CH<sub>3</sub>), 1.20 (4H, m, 3'-CH<sub>2</sub>, 4'-CH<sub>2</sub>), 1.40 - 1.48 (14H, m, 2'-CH<sub>2</sub>, C(CH<sub>3</sub>)<sub>3</sub>, ala-CH<sub>3</sub>), 2.90 (2H, m, 1'-CH<sub>2</sub>), 4.36 (1H, m, CH<sub>α</sub>), 5.15 (1H, d, *J* = 6.7 Hz, ala-NH), 6.24 (1H, s, H-4), 7.04 (1H, d, *J* = 7.6 Hz, H-8), 7.53 (1H, d, *J* = 8.4 Hz, H-9), 7.77 (1H, s, H-6), 9.54 (1H, br s, ArNH);  $\delta_{\text{C}}$  (75.5 MHz, CDCl<sub>3</sub>) 14.4 (5'-CH<sub>3</sub>), 17.6 (ala-CH<sub>3</sub>), 22.7 (4'-CH<sub>2</sub>), 28.3 (2'-CH<sub>2</sub>), 28.5 (1'-CH<sub>2</sub>), 28.8 (C(CH<sub>3</sub>)<sub>3</sub>), 32.2 (3'-CH<sub>2</sub>), 55.15 (CH), 81.7 (quat.), 105.8 (CH, C-4), 106.2 (CH, C-6), 117.0 (CH, C-8), 129.8 (quat., C-7), 131.4 (CH, C-9), 137.8 (quat., C-2), 142.9 (quat., C-1), 143.8 (quat., C-9a), 144.5 (quat., C-5a), 145.1 (quat., C-10a), 149.6 (quat., C-4a), 157.5 (carbamate C=O), 172.35 (amide C=O), 185.85 (C=O, C-3).

7-*N*-(*N*'-Boc-L-alanyl)amino-1-pentylphenoxazin-3-one **28a** (second spot) as a brown solid (0.10 g) mp 209-211 °C; (Found: MH<sup>+</sup>,

454.2332. Calc. for C<sub>25</sub>H<sub>32</sub>O<sub>5</sub>N<sub>3</sub>: MH, 454.2334);  $[\alpha]_{\text{D}}^{20}$  -273° (c 0.11, CHCl<sub>3</sub>);  $\nu_{\max}$  (KBr)/cm<sup>-1</sup> 3437 (NH), 1714 (C=O), 1647 (C=O), 1614 (C=O), 1591 (C=C), 1252 (C-O);  $\delta_{\text{H}}$  (300 MHz, CDCl<sub>3</sub>) 0.73 (3H, t, *J* = 6.6 Hz, 5'-CH<sub>3</sub>), 1.18 (4H, m, 3'-CH<sub>2</sub>, 4'-CH<sub>2</sub>), 1.27 - 1.42 (14H, m, 2'-CH<sub>2</sub>, C(CH<sub>3</sub>)<sub>3</sub>, ala-CH<sub>3</sub>), 2.58 (2H, m, 1'-CH<sub>2</sub>), 4.24 (1H, m, CH<sub>α</sub>), 5.05 (1H, d, *J* = 6.95 Hz, ala-NH), 5.95 (1H, s, H-4), 6.38 (1H, s, H-2), 6.93 (1H, d, *J* = 7.3 Hz, H-8), 7.39 (1H, d, *J* = 8.6 Hz, H-9), 7.67 (1H, s, H-6), 9.35 (1H, br s, ArNH);  $\delta_{\text{C}}$  (75.5 MHz, CDCl<sub>3</sub>) 14.4 (5'-CH<sub>3</sub>), 17.6 (ala-CH<sub>3</sub>), 22.8 (4'-CH<sub>2</sub>), 28.8 (C(CH<sub>3</sub>)<sub>3</sub>), 29.0 (2'-CH<sub>2</sub>), 29.95 (1'-CH<sub>2</sub>), 32.0 (3'-CH<sub>2</sub>), 55.5 (CH), 81.6 (quat.), 106.2 (CH, C-4), 106.4 (CH, C-6), 116.6 (CH, C-8), 129.7 (quat., C-7), 131.2 (CH, C-9), 131.7 (CH, C-2), 142.5 (quat., C-1), 144.9 (quat., C-9a), 146.8 (quat., C-5a), 147.6 (quat., C-10a), 150.4 (quat., C-4a), 157.1 (carbamate C=O), 172.2 (amide C=O), 186.7 (C=O, C-3).

**General procedure for the peptide coupling of 7-aminophenoxazin-3-ones **6c,d****

The 7-aminophenoxazin-3-one **6c,d** (0.4 mmol) was dissolved in dry DMF (5 ml) and 5% Pd/C (0.010 g) was added to the solution. The flask was placed in a hydrogenator at room temperature and an atmosphere of hydrogen was maintained while the reaction mixture was stirred for 1 hour. The completion of the reduction was indicated by the replacement of the deep purple colour of the solution by a greyish-green colour. In a separate flask, *N*'-Boc-β-alanine (0.089g, 0.47 mmol), HOBt (0.072 g, 0.47 mmol), and DIC (0.07 ml, 0.47 mmol) were dissolved in dry DCM (5 ml) and the resulting mixture was stirred at room temperature for 1 hour. After this period, the contents of the second flask were introduced into the first flask (which contained the reduced form of 7-aminophenoxazin-3-one) *via* syringe, under an inert atmosphere. The mixture was stirred for a further 20 hours at room temperature then filtered through celite and the solvent evaporated under reduced pressure. The residue was redissolved in ethyl acetate (20 ml), the organic layer was washed with 1M HCl (20 ml), 10% Na<sub>2</sub>CO<sub>3</sub> (20 ml) and water (20 ml). The organic solution was dried over MgSO<sub>4</sub>, filtered and evaporated under reduced pressure to give a residue, which was purified by column chromatography using light petroleum (60-80 °C) : ethyl acetate (30:70) as eluent.

**7-*N*-(*N*'-Butoxycarbonyl-β-alanyl)amino-1,2-dimethylphenoxazin-3-one **26c****

Prepared from 7-amino-1,2-dimethylphenoxazin-3-one **6c** (0.110 g, 0.4578 mmol). 7-*N*-(*N*'-Butoxycarbonyl-β-alanyl)amino-1,2-dimethylphenoxazin-3-one **26c** was obtained as a brown-red solid (0.104 g, 55%); mp 222-223 °C (decomp.); (Found: MH<sup>+</sup>, 412.1871. Calc. for C<sub>22</sub>H<sub>26</sub>O<sub>5</sub>N<sub>3</sub>: MH, 412.1867);  $\nu_{\max}$  (KBr)/cm<sup>-1</sup> 3341, 3272 (NH), 1705, 1689 (C=O), 1616 (C=C), 1253 (C-O);  $\delta_{\text{H}}$  (300 MHz; DMSO-*d*<sub>6</sub>) 1.38 (9H, s, C(CH<sub>3</sub>)<sub>3</sub>), 2.06 (3H, s, CH<sub>3</sub>), 2.36 (3H, s, CH<sub>3</sub>), 2.53-2.55 (2H, m, H-2'), 3.22-3.28 (2H, m, H-3'), 6.22 (1H, s, H-4), 6.88 (1H, br s, NH), 7.48 (1H, dd, *J* = 8.7 and 2.0 Hz, H-8), 7.75 (1H, d, *J* = 8.7 Hz, H-9), 7.87 (1H, d, *J* = 2.0 Hz, H-6), 10.47 (1H, s, ArNH);  $\delta_{\text{C}}$  (75 MHz; DMSO-*d*<sub>6</sub>) 13.4 (CH<sub>3</sub>), 13.5 (CH<sub>3</sub>), 29.1 (CH<sub>3</sub>, C(CH<sub>3</sub>)<sub>3</sub>), 37.3 (CH<sub>2</sub>, C-3'), 37.9 (CH<sub>2</sub>, C-2'), 78.5 (quat., C(CH<sub>3</sub>)<sub>3</sub>), 103.8, (CH), 105.5 (CH, C-4), 117.0 (CH, C-8), 129.4 (quat., C-7), 131.3 (CH, C-9), 138.4 (quat.), 139.0 (quat.), 143.7 (quat.), 144.9 (quat.), 147.0 (quat., C-4a), 150.0 (quat.), 156.3 (quat., carbamate C=O), 171.2 (quat., amide C=O), 185.1 (quat., C-3).



**7-*N*-(*N*-<sup>t</sup>Butoxycarbonyl-β-alanyl)amino-1,2,4-trimethylphenoxazin-3-one **26d****

Prepared from 7-amino-1,2,4-trimethylphenoxazin-3-one **6d** (0.100 g, 0.39 mmol). 7-*N*-(*N*-<sup>t</sup>Butoxycarbonyl-β-alanyl)amino-1,2,4-trimethylphenoxazin-3-one **26d** was obtained as an orange solid (0.113 g, 68 %); mp 215-216 °C; (Found: MH<sup>+</sup>, 426.2025. Calc. for C<sub>23</sub>H<sub>28</sub>O<sub>5</sub>N<sub>3</sub>: MH, 426.2023); ν<sub>max</sub> (KBr)/cm<sup>-1</sup> 3341 (NH), 1704 (C=O), 1686 (C=O), 1616 (C=C), 1250 (C-O); δ<sub>H</sub> (500 MHz; DMSO-*d*<sub>6</sub>) 1.39 (9H, s, C(CH<sub>3</sub>)<sub>3</sub>), 1.98 (3H, s, CH<sub>3</sub>), 2.05 (3H, s, CH<sub>3</sub>), 2.31 (3H, s, CH<sub>3</sub>), 2.55 (2H, t, *J* = 7.0 Hz, H-2'), 3.24-3.28 (2H, m, H-3'), 6.92 (1H, t, *J* = 5.2 Hz, NH), 7.37 (1H, dd, *J* = 8.7 and 2.1 Hz, H-8), 7.68 (1H, d, *J* = 8.7 Hz, H-9), 7.91 (1H, d, *J* = 2.1 Hz, H-6), 10.43 (1H, s, ArNH); δ<sub>C</sub> (125 MHz; DMSO-*d*<sub>6</sub>) 8.5 (CH<sub>3</sub>), 13.3 (CH<sub>3</sub>), 13.7 (CH<sub>3</sub>), 29.1 (CH<sub>3</sub>, C(CH<sub>3</sub>)<sub>3</sub>), 37.2 (CH<sub>2</sub>, C-3'), 37.9 (CH<sub>2</sub>, C-2'), 78.5 (quat., C(CH<sub>3</sub>)<sub>3</sub>), 105.6 (CH, C-6), 113.1 (quat., C-4), 116.6 (CH, C-8), 129.0 (quat., C-7), 131.0 (CH, C-9), 137.4 (quat.), 138.3 (quat.), 143.3 (quat., C-9a), 145.2 (quat., C-5a), 146.0 (quat., C-4a), 146.8 (quat., C-4a), 156.2 (quat., carbamate C=O), 171.1 (quat., amide C=O), 184.7 (quat., C-3).

**Deprotection of *N*-<sup>t</sup>butoxycarbonyl group**

The corresponding *N*-<sup>t</sup>butoxycarbonyl protected compound **26** (0.2 mmol) was dissolved in dry DCM (3 ml) and TFA (1 ml) or neat TFA (2 ml) was added to the solution. The reaction mixture was stirred at room temperature until completion of reaction (as indicated by TLC). The solvent and excess of TFA were evaporated under reduced pressure and the residue was purified by column chromatography on silica, using a gradient eluent starting with light petroleum (60-80 °C) : ethyl acetate (50:50 to 0:100) and, finally, ethyl acetate : methanol (90:10).

**7-*N*-(β-Alanyl)amino-1-pentylphenoxazin-3-one trifluoroacetate salt **27a****

Prepared from 7-*N*-(*N*-<sup>t</sup>Boc-β-Alanyl)amino-1-pentylphenoxazin-3-one **26a** (80 mg, 0.18 mmol) and TFA (2 ml). After work-up, 7-*N*-(β-Alanyl)amino-1-pentylphenoxazin-3-one trifluoroacetate salt **27a** was obtained as a brown solid (80 mg, 97 %) mp 215-216 °C; (Found: M<sup>+</sup>, 354.1798. Calc. for C<sub>20</sub>H<sub>24</sub>O<sub>3</sub>N<sub>3</sub>: M, 354.1812); ν<sub>max</sub> (KBr)/cm<sup>-1</sup> 3448, 3259 (NH), 1678 (C=O), 1647 (C=O), 1612 (C=O), 1250 (C-O); δ<sub>H</sub> (300 MHz, DMSO-*d*<sub>6</sub>) 0.89 (3H, t, *J* = 6.9 Hz, 5'-CH<sub>3</sub>), 1.16 (4H, m, 3'-CH<sub>2</sub>, 4'-CH<sub>2</sub>), 1.62 (2H, m, 2'-CH<sub>2</sub>), 2.77 (4H, m, 1'-CH<sub>2</sub>, CH<sub>2</sub>), 3.13 (2H, m, CH<sub>2</sub>), 6.19 (1H, d, *J* = 1.4 Hz, H-4), 6.59 (1H, d, *J* = 1.4 Hz, H-2), 7.50 (1H, d, *J* = 8.6 Hz, H-8), 7.8 (1H, d, *J* = 8.7 Hz, H-9), 7.9 (4H, br, H-6, NH<sub>3</sub><sup>+</sup>), 10.82 (1H, br, ArNH); δ<sub>C</sub> (75.5 MHz, DMSO-*d*<sub>6</sub>) 14.7 (CH<sub>3</sub>, C-5'), 22.7 (CH<sub>2</sub>, C-4'), 29.1 (CH<sub>2</sub>, C-2'), 29.8 (CH<sub>2</sub>, C-1'), 31.8 (CH<sub>2</sub>, C-3'), 34.5 (CH<sub>2</sub>), 35.5 (CH<sub>2</sub>), 105.6 (4-CH), 106.0 (CH, C-6), 117.1 (CH, C-8), 122.6 (CH, C-9), 129.4 (quat., C-7), 131.7 (CH, C-2), 143.8 (quat., C-1), 145.2 (quat., C-9a), 146.7 (quat., C-5a), 147.4 (quat., C-10a), 150.85 (quat., C-4a), 170.2 (C=O), 185.9 (C=O, C-3).

**7-*N*-(β-Alanyl)amino-2-chloro-1-pentylphenoxazin-3-one trifluoroacetate salt **27b****

Prepared from 7-*N*-(*N*-<sup>t</sup>Boc-β-Alanyl)amino-2-chloro-1-pentylphenoxazin-3-one **26b** (80 mg, 0.18 mmol) and TFA (2 ml). After work-up, 7-*N*-(β-Alanyl)amino-2-chloro-1-pentylphenoxazin-3-one trifluoroacetate salt **27b** was obtained as a brown solid (80 mg, 97 %) mp 220-221 °C; (Found: M<sup>+</sup>, 388.1422. Calc. for C<sub>20</sub>H<sub>23</sub>O<sub>3</sub>N<sub>3</sub>Cl: M, 388.1422); ν<sub>max</sub> (KBr) / cm<sup>-1</sup> 3454, 3265 (NH),

1678 (C=O), 1601 (C=O), 1577 (C=C), 1252 (C-O); δ<sub>H</sub> (300 MHz, DMSO-*d*<sub>6</sub>) 0.89 (3H, m, 5'-CH<sub>3</sub>), 1.38 (4H, m, 3'-CH<sub>2</sub>, 4'-CH<sub>2</sub>), 1.59 (2H, m, 2'-CH<sub>2</sub>), 2.81 (2H, m, CH<sub>2</sub>), 3.00 (1'-CH<sub>2</sub>), 3.14 (2H, m, CH<sub>2</sub>), 6.42 (1H, s, H-4), 7.55 (1H, d, *J* = 7.9 Hz, H-8), 7.82 (1H, d, *J* = 8.4 Hz, H-9), 7.93 (4H, br, H-6, NH<sub>3</sub><sup>+</sup>), 10.85 (1H, br, ArNH); δ<sub>C</sub> (75.5 MHz, DMSO-*d*<sub>6</sub>) 14.6 (CH<sub>3</sub>, C-5'), 22.6 (CH<sub>2</sub>, C-4'), 28.4 (CH<sub>2</sub>, C-2'), 29.8 (CH<sub>2</sub>, C-1'), 32.0 (CH<sub>2</sub>, C-3'), 34.6 (CH<sub>2</sub>), 35.5 (CH<sub>2</sub>), 105.4 (CH, C-4), 105.5 (CH, C-6), 117.5 (CH, C-8), 129.7 (quat., C-7), 132.0 (CH, C-9), 136.8 (quat., C-2), 143.7 (quat., C-1), 144.4 (quat., C-9a), 144.85 (quat., C-5a), 145.1 (quat., C-10a), 150.8 (quat., C-4a), 169.8 (C=O), 177.8 (C=O, C-3).

**7-*N*-(β-Alanyl)amino-1,2-dimethylphenoxazin-3-one trifluoroacetate salt **27c****

Prepared from 7-*N*-(*N*-<sup>t</sup>Boc-β-Alanyl)amino-1,2-dimethylphenoxazin-3-one **26c** (0.047 g, 0.1138 mmol) dry DCM (3 ml) and TFA (1 ml). 7-*N*-(β-Alanyl)amino-1,2-dimethylphenoxazin-3-one trifluoroacetate salt **27c** was isolated as a red solid (0.046 g, 95%) mp 191-192 °C; (Found: M<sup>+</sup>, 312.1338. Calc. for C<sub>17</sub>H<sub>18</sub>O<sub>3</sub>N<sub>3</sub>: M, 312.1343); ν<sub>max</sub> (KBr)/cm<sup>-1</sup> 3274, 3192, 3111 (NH), 1676 (C=O), 1592 (C=C), 1254 (C-O); δ<sub>H</sub> (300 MHz, CD<sub>3</sub>OD) 2.01 (3H, s, CH<sub>3</sub>), 2.29 (3H, s, CH<sub>3</sub>), 2.78 (2H, t, *J* = 6.2 Hz, H-2'), 3.20-3.22 (2H, m, H-3'), 6.03 (1H, s, H-4), 7.27 (1H, dd, *J* = 8.7 and 2.2 Hz, H-8), 7.55 (1H, d, *J* = 8.7 Hz, H-9), 7.80 (1H, d, *J* = 2.2 Hz, H-6); δ<sub>C</sub> (125 MHz; CD<sub>3</sub>OD) 11.8 (CH<sub>3</sub>), 12.0 (CH<sub>3</sub>), 33.1 (CH<sub>2</sub>), 35.6 (CH<sub>2</sub>), 104.8 (CH, C-4), 105.8 (CH, C-6), 116.6 (CH, C-8), 129.8 (quat., C-7), 130.8 (CH, C-9), 139.0 (quat.), 139.3 (quat.), 142.8 (quat.), 144.7 (quat.), 146.6 (quat., C-4a) 150.0 (quat.), 169.9 (quat., amide C=O), 186.4 (quat., C-3).

**7-*N*-(β-Alanyl)amino-1,2,4-trimethylphenoxazin-3-one trifluoroacetate salt **27d****

Prepared from 7-*N*-(*N*-<sup>t</sup>Boc-β-Alanyl)amino-1,2,4-trimethylphenoxazin-3-one **26d** (0.081 g, 0.1897 mmol). 7-*N*-(β-Alanyl)amino-1,2,4-trimethylphenoxazin-3-one trifluoroacetate salt **27d** was isolated as a red solid (0.080 g, 96%) mp 217-219 °C (decomp.); (Found: M<sup>+</sup>, 326.1506. Calc. for C<sub>18</sub>H<sub>20</sub>O<sub>3</sub>N<sub>3</sub>: M, 326.1499); ν<sub>max</sub> (KBr)/cm<sup>-1</sup> 3328, 3108 (NH), 1701 (C=O), 1686 (C=O), 1578 (C=C), 1207 (C-O); δ<sub>H</sub> (300 MHz; DMSO-*d*<sub>6</sub>) 1.96 (3H, s, CH<sub>3</sub>), 2.04 (3H, s, CH<sub>3</sub>), 2.30 (3H, s, CH<sub>3</sub>), 2.76-2.81 (2H, m, H-2'), 3.11-3.16 (2H, m, H-3'), 7.38 (1H, dd, *J* = 8.7 and 2.2 Hz, H-8), 7.69 (1H, d, *J* = 8.7 Hz, H-9), 7.86 (3H, br, s, -N<sup>+</sup>H<sub>3</sub>), 7.88 (1H, d, *J* = 2.2 Hz, H-6), 10.69 (1H, s, ArNH); δ<sub>C</sub> (75 MHz; DMSO-*d*<sub>6</sub>) 7.6 (CH<sub>3</sub>), 12.4 (CH<sub>3</sub>), 12.8 (CH<sub>3</sub>), 33.5 (CH<sub>2</sub>), 34.7 (CH<sub>2</sub>), 104.9 (CH, C-6), 112.3 (quat., C-4), 115.7 (CH, C-8), 128.3 (quat., C-7), 130.2 (CH, C-9), 136.5 (quat.), 137.5 (quat.), 142.0 (quat.), 144.3 (quat.), 145.1 (quat., C-4a), 146.2 (quat., C-10a), 169.1 (quat., amide C=O), 183.9 (quat., C-3).

**7-*N*-(L-Alanyl)amino-1-pentylphenoxazin-3-one trifluoroacetate salt **29a****

Prepared from 7-*N*-(*N*-<sup>t</sup>Boc-L-Alanyl)amino-1-pentylphenoxazin-3-one **28a** (80 mg, 0.18 mmol) and TFA (2 cm<sup>3</sup>). After work-up, 7-*N*-(L-Alanyl)amino-1-pentylphenoxazin-3-one trifluoroacetate salt **29a** was obtained as a brown solid (80 mg, 97 %) mp 168-170 °C; (Found: C, 56.5; H, 5.15; N, 9.0. C<sub>22</sub>H<sub>24</sub>O<sub>3</sub>N<sub>3</sub>F<sub>3</sub> requires C, 56.5; H, 5.2; N, 9.0 %) (Found: M<sup>+</sup>, 354.1809. Calc. for C<sub>20</sub>H<sub>24</sub>O<sub>3</sub>N<sub>3</sub>: M, 354.1812); [α]<sub>D</sub><sup>20</sup> + 145 ° (c 0.06, MeOH); ν<sub>max</sub> (KBr) / cm<sup>-1</sup> 3452 (NH), 3276 (NH), 1682 (C=O), 1645 (C=O), 1585 (C=C), 1250 (C-O); δ<sub>H</sub> (300 MHz, CD<sub>3</sub>OD) 0.84 (3H, t, *J* = 6.9 Hz, 5'-CH<sub>3</sub>), 1.31 (4H, m, 3'-CH<sub>2</sub>,

4'-CH<sub>2</sub>), 1.55 (3H, d, *J* = 7.05 Hz, ala-CH<sub>3</sub>), 1.58 (2H, m, 2'-CH<sub>2</sub>), 2.76 (2H, m, 1'-CH<sub>2</sub>), 4.05 (1H, m, CH<sub>α</sub>), 6.09 (1H, d, *J* = 2.1 Hz, H-4), 6.53 (1H, d, *J* = 2.1 Hz, H-3), 7.41 (1H, dd, *J* = 8.7 and 2.2 Hz, H-8), 7.68 (1H, d, *J* = 8.7 Hz, H-9), 7.83 (1H, d, *J* = 2.2 Hz, H-6); δ<sub>C</sub> (75.5 MHz, CD<sub>3</sub>OD) 13.2 (5'-CH<sub>3</sub>), 16.4 (ala-CH<sub>3</sub>), 22.35 (4'-CH<sub>2</sub>), 29.1 (2'-CH<sub>2</sub>), 29.7 (1'-CH<sub>2</sub>), 31.7 (3'-CH<sub>2</sub>), 50.2 (CH), 105.4 (CH, C-4), 106.4 (CH, C-6), 117.2 (CH, C-8), 130.2 (quat., C-7), 131.1 (CH, C-9), 131.3 (CH, C-2), 142.75 (quat., C-1), 145.1 (quat., C-9a), 146.7 (quat., C-5a), 148.5 (quat., C-10a), 151.05 (quat., C-4a), 168.9 (C=O), 187.3 (C=O, C-3).

### 7-*N*-(*L*-Alanyl)amino-2-chloro-1-pentylphenoxazin-3-one trifluoroacetate salt **29b**

Prepared from 7-*N*-(*N*'-Boc-*L*-Alanyl)amino-2-chloro-1-pentylphenoxazin-3-one **28b** (0.10 g, 0.21 mmol) and TFA (2 cm<sup>3</sup>). After work-up, 7-*N*-(*L*-Alanyl)amino-2-chloro-1-pentyl phenoxazin-3-one trifluoroacetate salt **29b** was obtained as a brown solid (0.095 g, 92 %) mp > 290 °C; (HRMS Found: M<sup>+</sup>, 388.1422. Calc. for C<sub>20</sub>H<sub>23</sub>O<sub>3</sub>N<sub>3</sub>Cl: M, 388.1422), [α]<sub>D</sub><sup>20</sup> + 100° (c 0.07, MeOH); ν<sub>max</sub> (KBr)/cm<sup>-1</sup> 3452 (NH), 3276 (NH), 1682 (C=O), 1645 (C=O), 1583 (C=C), 1250 (C-O); δ<sub>H</sub> (300 MHz, CD<sub>3</sub>OD) 0.85 (3H, t, *J* = 6.8 Hz, 5'-CH<sub>3</sub>), 1.31 (4H, m, 3'-CH<sub>2</sub>, 4'-CH<sub>2</sub>), 1.47 (2H, m, 2'-CH<sub>2</sub>), 1.56 (3H, d, *J* = 6.8 Hz, ala-CH<sub>3</sub>), 2.98 (2H, m, 1'-CH<sub>2</sub>), 4.05 (1H, q, *J* = 6.9 Hz, CH<sub>α</sub>), 6.17 (1H, s, H-4), 7.36 (1H, d, *J* = 7.6 Hz, H-8), 7.64 (1H, d, *J* = 8.7 Hz, H-9), 7.89 (1H, s, H-6); δ<sub>C</sub> (75.5 MHz, CD<sub>3</sub>OD) 13.3 (5'-CH<sub>3</sub>), 16.4 (ala-CH<sub>3</sub>), 22.4 (4'-CH<sub>2</sub>), 28.0 (2'-CH<sub>2</sub>), 28.2 (1'-CH<sub>2</sub>), 32.0 (3'-CH<sub>2</sub>), 50.2 (CH), 104.85 (CH, C-4), 106.0 (CH, C-6), 117.3 (CH, C-8), 130.1 (quat., C-7), 131.4 (CH, C-9), 136.8 (quat., C-2), 143.3 (quat., C-1), 144.0 (quat., C-9a), 144.8 (quat., C-5a), 144.9 (quat., C-10a), 150.2 (quat., C-4a), 169.0 (C=O), 178.8 (C=O, C-3).

### Columbia agar solution preparation

Gram-positive and Gram-negative bacteria were cultured on Columbia agar. 1 Litre of Columbia agar was prepared as follows; Columbia agar (41 g) was dissolved by boiling in distilled water (1 l). The solution was then autoclaved at 116 °C for 10 min. and left to cool at 50 °C.

### Media preparation

The substrates to be tested were initially dissolved in DMSO or distilled water to give solutions of 10 mg/ml. The substrate solutions were incorporated into Columbia agar solution (200 ml) and added to sterile plates to give final concentrations of 50 mg/l. Columbia agar alone was used as a growth control. Solidified plates were surface dried in a warm air cabinet for 5 min..

### Bacterial suspension preparation

Bacterial strains were obtained from the National Collection of Type Cultures (NCTC), Colindale, U.K., the American Type Culture Collection (ATCC), Cockeysville, U.S.A., or were isolated from clinical samples (wild strains) at the Microbiology Department of the Freeman Hospital, Newcastle-upon-Tyne, U.K..

McFarland tubes were labelled with numbers corresponding to the bacterial code on the plates. Sterile distilled water (2 ml) was added to each tube. Each bacterium was inoculated into the tube using a sterile loop. A densitometer was used to adjust the turbidity to 0.5 McFarland units (1.5 × 10<sup>8</sup> organisms/ml).

### Multipoint inoculation

Each bacterial suspension (200 μl) was pipetted into the corresponding tubes of a multipoint inoculator. Each set of plates received 1 μl of bacterial suspension, giving 1.5 × 10<sup>5</sup> organisms per spot on each inoculation. Twenty strains were inoculated per plate and the plates were incubated for 24 and 48 hours at 30 °C, and 24 and 48 hours at 37 °C.

### Activity determination

The activity of the test substrates was determined by the development of red, pink, purple or orange colonies after incubation. The control plate was first taken for each substrate tested and examined for growth and colour. Each test plate was then compared to the control and the presence of red, pink, purple or orange colour was considered as positive evidence for the hydrolysis of the substrate by alanyl aminopeptidase; no colour or a pale yellow was considered as negative.

### References

- 1 A. Carricajo, S. Boiste, J. Thore, G. Aubert, Y. Gille, and A. M. Freydiere, *Eur. J. Clin. Microbiol. Infect. Dis.*, 1999, **18**, 796; F. Fenollar and D. Raoult, *Eur. J. Clin. Microbiol. Infect. Dis.*, 2000, **19**, 33.
- 2 H. Komeda and Y. Asano, *FEBS J.*, 2005, **272**, 3075.
- 3 B. Fricke and H. Aurich, *J. Basic Microbiol.*, 1993, **33**, 291.
- 4 M. Laurans, A. Arion, M. Fines-Guyon, A. Regeasse, J. Brouard, R. Leclercq, and J. H. Duhamel, *Archiv. de Pediatrie*, 2006, **13**, S22.
- 5 R. G. Brooks and J. S. Remington, *Transplant-related infections*, in *Hospital infections*, eds. J. V. Bennett and P. S. Brachman, Little, Brown and Co., Boston, 2nd edn., 1986, pp. 581–618.
- 6 J. C. Valdez, M. C. Peral, M. Rachid, M. Santana, and G. Perdigon, *Clin. Microbiol. Infect.*, 2005, **11**, 472.
- 7 I. Gustafsson and J. L. Martinez, *Rev. Med. Microbiol.*, 2005, **16**, 155.
- 8 V. Nagappan and P. Kazanjian, *HIV Clinical Trials*, 2005, **6**, 213.
- 9 D. van der Waaij, *J. Antimicrob. Chemother.*, 1982, **10**, 263.
- 10 H. Nikaïdo, *Science*, 1994, **264**, 382.
- 11 P. Richard, *J. Infect. Dis.*, 1994, **170**, 377.
- 12 S. Fujita, A. Tonohata, T. Matsuoka, N. Okado, and T. Hashimoto, *J. Clin. Microbiol.*, 1992, **30**, 2728.
- 13 H. Hollstein, *Chem. Rev.*, 1974, **74**, 625; H. Brockmann, *Angew. Chem.*, 1960, **72**, 939.
- 14 R. J. Anderson, P. W. Groundwater, A. James, D. Monget and A. V. Zaytsev, PCT Patent WO 2006/030119 A1.
- 15 R. Willstätter and E. Mayer, *Chem. Ber.*, 1904, 1498.
- 16 C. W. Bird and M. Latif, *Tetrahedron*, 1980, **36**, 1813; C. W. Bird, and M. Latif, *Tetrahedron*, 1980, **36**, 529.
- 17 M. Michman, M. Oron and H. J. Schaefer, *Coll. Czech Chem. Commun.*, 2000, **65**, 924.
- 18 L. N. Ferguson, *Chem. Rev.*, 1946, **38**, 230.
- 19 T. H. James and A. Weissberger, *J. Am. Chem. Soc.*, 1938, **60**, 98.
- 20 F. W. Scott and T. L. Pitt, *J. Med. Microbiol.*, 2004, **53**, 609.
- 21 B. M. Trost, H. C. Shen, L. Dong, J.-P. Surivet, and C. Sylvain, *J. Am. Chem. Soc.*, 2004, **126**, 11966.
- 22 R. Rathore, E. Bosch and J. K. Kochi, *J. Chem. Soc. Perkin Trans. 2*, 1994, 1157.
- 23 C.-X. Zhao, X.-K. Jiang, and J.-Y. Zhang, *J. Fluorine Chem.*, 1985; **27**, 401.
- 24 T. Smith, *J. Am. Chem. Soc.*, 1944, **66**, 1523.
- 25 L. Giraud and A. Giraud, *Synthesis*, 1998, 1153.
- 26 C. J. K. Adderley and F. R. Hewgill, *J. Chem. Soc. C*; 1968, 1438.
